# Supplementary material for: Drivers of long-term variability in CO 2 net ecosystem exchange in a temperate peatland
Source: Copernicus journal article supplement (doi:10.5194/bg-12-1799-2015), 2015-03-18
Supplement: Supplementary file [file bg-12-1799-2015-supplement.pdf]

Supplement of Biogeosciences, 12, 1799–1811, 2015  
<http://www.biogeosciences.net/12/1799/2015/>  
doi:10.5194/bg-12-1799-2015-supplement  
© Author(s) 2015. CC Attribution 3.0 License.

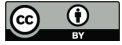

*Supplement of*

## **Drivers of long-term variability in CO<sub>2</sub> net ecosystem exchange in a temperate peatland**

**C. Helfter et al.**

*Correspondence to:* C. Helfter (caro2@ceh.ac.uk)

## Supplementary material

Table S1: Non-linear regression coefficients (a and b) and associated  $R^2$  values calculated for 24-hour averages of measured night time NEE and  $T_{\text{air}}$  using eq. (1), and annual values of  $Q_{10}$  ( $T_1 = 5\text{ }^\circ\text{C}$ ,  $T_2 = 15\text{ }^\circ\text{C}$ ) calculated using eq. (2).

| Year | a      | b      | $R^2$ | $Q_{10}$ |
|------|--------|--------|-------|----------|
| 2002 | 0.5876 | 0.1285 | 0.24  | 3.61     |
| 2003 | 0.5342 | 0.1243 | 0.32  | 3.47     |
| 2004 | 0.8119 | 0.1193 | 0.37  | 3.30     |
| 2005 | 0.5901 | 0.1699 | 0.68  | 5.47     |
| 2006 | 0.6596 | 0.1212 | 0.59  | 3.36     |
| 2007 | 0.7775 | 0.0974 | 0.48  | 2.65     |
| 2008 | 0.4398 | 0.1603 | 0.61  | 4.97     |
| 2009 | 0.9252 | 0.0793 | 0.20  | 2.21     |
| 2010 | 0.5757 | 0.1103 | 0.46  | 3.01     |
| 2011 | -      | -      | -     | -        |
| 2012 | 0.8329 | 0.1261 | 0.61  | 3.53     |
| 2013 | 1.2919 | 0.0824 | 0.48  | 2.28     |

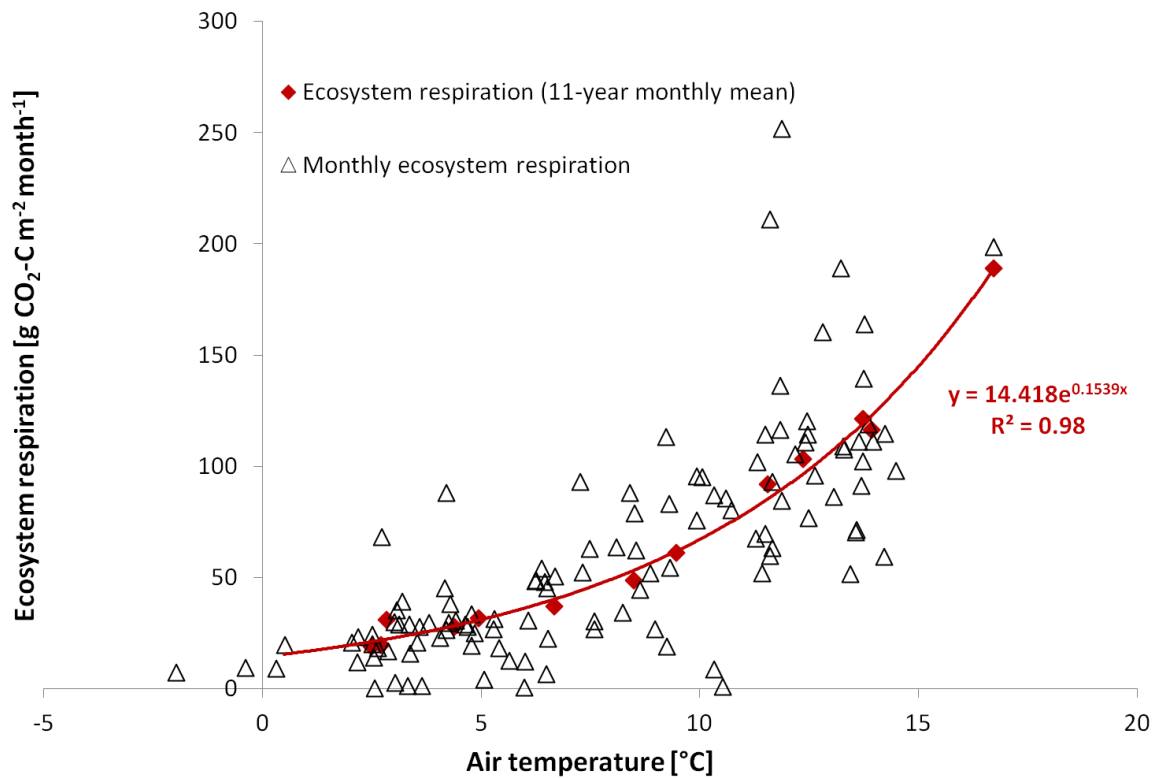

Figure S2: Monthly averages (open triangles) and 11-year monthly averages (solid diamonds) of night time ecosystem respiration as a function of air temperature. The solid line represents the non-linear regression (Eq.(1)) of 11-year monthly averages of  $R_{\text{eco}}$  vs. air temperature.

Table S3: light curve parameters  $GPP_{sat}$  and  $\alpha$ , and associated  $R^2$  obtained by fitting Eq. (3) to growing season GPP vs. PAR. No PAR data for 2002 and no GPP data for 2011.

| Year | $GPP_{sat}$ | $\alpha$ | $R^2$ |
|------|-------------|----------|-------|
| 2002 | -           | -        | -     |
| 2003 | 9.98        | 0.033    | 0.48  |
| 2004 | 18.03       | 0.036    | 0.55  |
| 2005 | 21.41       | 0.064    | 0.32  |
| 2006 | 12.39       | 0.098    | 0.45  |
| 2007 | 16.04       | 0.035    | 0.59  |
| 2008 | 11.98       | 0.032    | 0.48  |
| 2009 | 12.05       | 0.023    | 0.50  |
| 2010 | 9.23        | 0.027    | 0.69  |
| 2011 | -           | -        | -     |
| 2012 | 12.59       | 0.040    | 0.60  |
| 2013 | 12.57       | 0.035    | 0.59  |

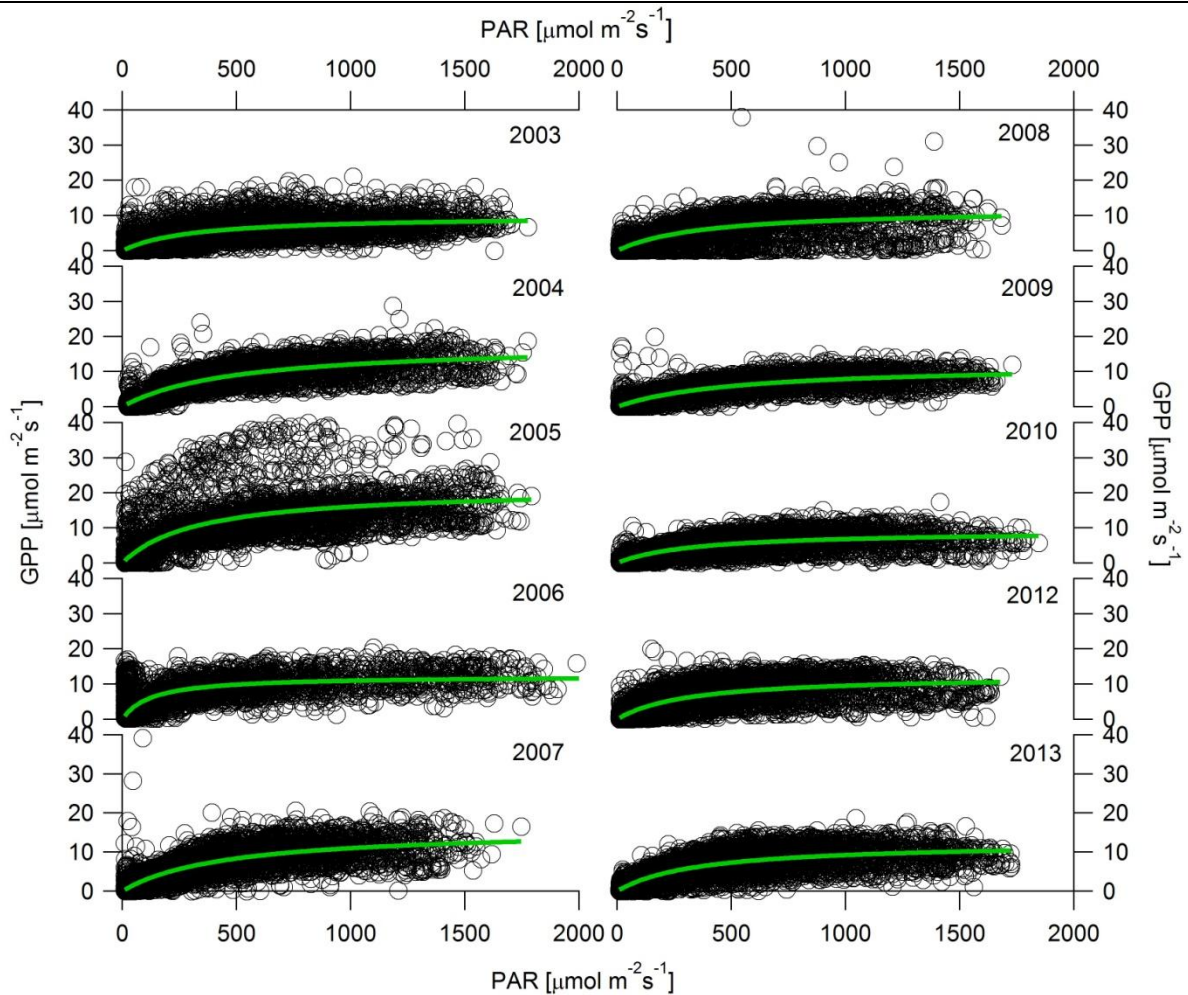

Figure S4: GPP vs. PAR (open circles) during the growing seasons of 2003-2013 (no data for 2011 due to instrument malfunction) and associated light curves calculated using Eq. (3).
